# Supplementary material for: Ribophorin II regulates breast tumor initiation and metastasis through the functional suppression of GSK3β
Source: PubMed Central journal article supplement — Sci Rep. 2013 Aug 20;3:2474. doi: 10.1038/srep02474 (PMC3747512; doi:10.1038/srep02474), 2013-08-20
Supplement: srep02474-s1.pdf [file srep02474-s1.pdf]

Supporting information

:supplementary figure 1-18 and table 1-2

Ribophorin-2 regulates breast tumor initiation and metastasis through the functional suppression of GSK3 $\beta$

Ryou-u Takahashi<sup>1</sup>, Fumitaka Takeshita<sup>1</sup>, Kimi Honma<sup>1</sup>, Masaya Ono<sup>2</sup>, Kikuya Kato<sup>3</sup> & Takahiro Ochiya<sup>1\*</sup>

\*Address correspondence to Takahiro Ochiya, Ph.D.  
Chief, Division of Molecular and Cellular Medicine,  
National Cancer Center Research Institute,  
1-1, Tsukiji 5-chome, Chuo-ku, Tokyo 104-0045, Japan  
Phone: +81-3-3542-2511 ext. 4800  
Fax: +81-3-5565-0727  
E-mail: [tochiya@ncc.go.jp](mailto:tochiya@ncc.go.jp)

- 1) Division of Molecular and Cellular Medicine,
- 2) Division of Chemotherapy and Clinical Research, National Cancer Center Research Institute, 1-1, Tsukiji 5-chome, Chuo-ku, Tokyo 104-0045, Japan
- 3) Research Institute, Osaka Medical Center for Cancer and Cardiovascular Diseases, 1-3-2 Nakamichi, Higashinari-ku, Osaka 537-8511, Japan.

Running Title: RPN2 stabilizes p53 mutant in breast cancer

Keywords: Breast cancer, Cancer stem cell, Mutant p53, GSK3 $\beta$ , Heat shock proteins

A

Fat Pad Injection with CSCs

Cell line: MDA-MB-231-D3H2-LN-Luc (MM231-LN)

Day 18

|                          |        |        |        |                           |
|--------------------------|--------|--------|--------|---------------------------|
| Cell Number (cells/site) | $10^2$ | $10^3$ | $10^4$ | *Unsorted cells<br>$10^6$ |
| Tumor Formation          | 3/4    | 3/4    | 4/4    | 2/2                       |

\*Unsorted cells as positive control

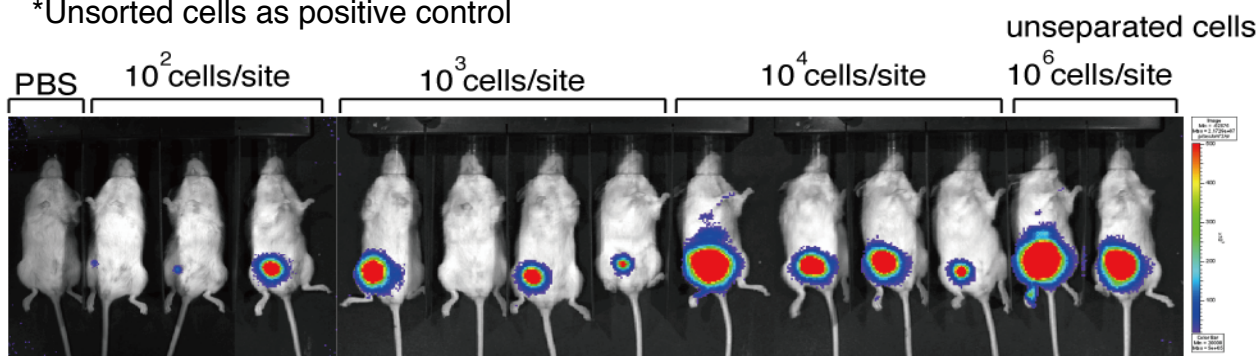

B

Fat Pad Injection with CSCs

Cell line: MM231-LN

$10^2$  cells/site

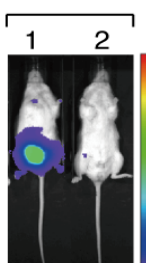

|                 |      |          |
|-----------------|------|----------|
| Day 42          | CSCs | Non-CSCs |
| Tumor Formation | 3/3  | 1/3      |

1. CSCs Fraction
2. Unseparated Fraction

### Figure S1

Limiting Dilution Analysis of Breast CSC Fraction.

(A) Tumor incidence of CSCs ( $CD44^{high}/CD24^{low}$ ) after mammary fat pad injection.

(B) Tumor incidence of CSCs and non-CSCs after mammary fat pad injection.

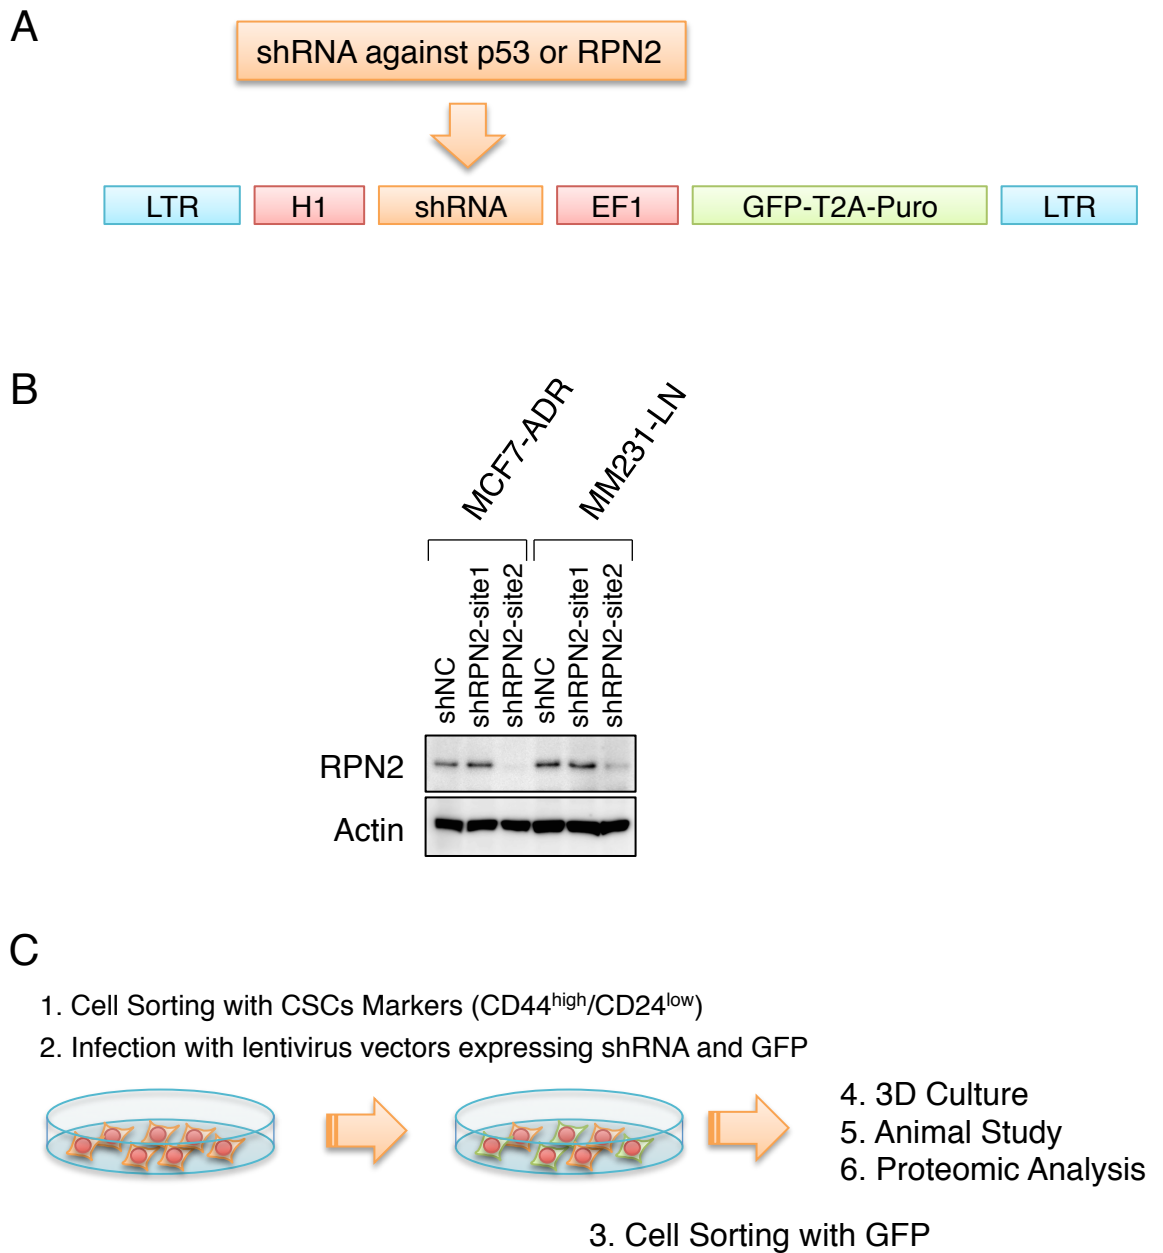

**Figure S2**

Lentiviral vectors utilized in the present study.

(A) Diagram of the lentiviral vector. The characterization of the knockdown effect of pGreenpuro-RPN2shRNA (B) by Western blotting. (C) Experimental procedure for the analysis of RPN2 in CSCs fraction.

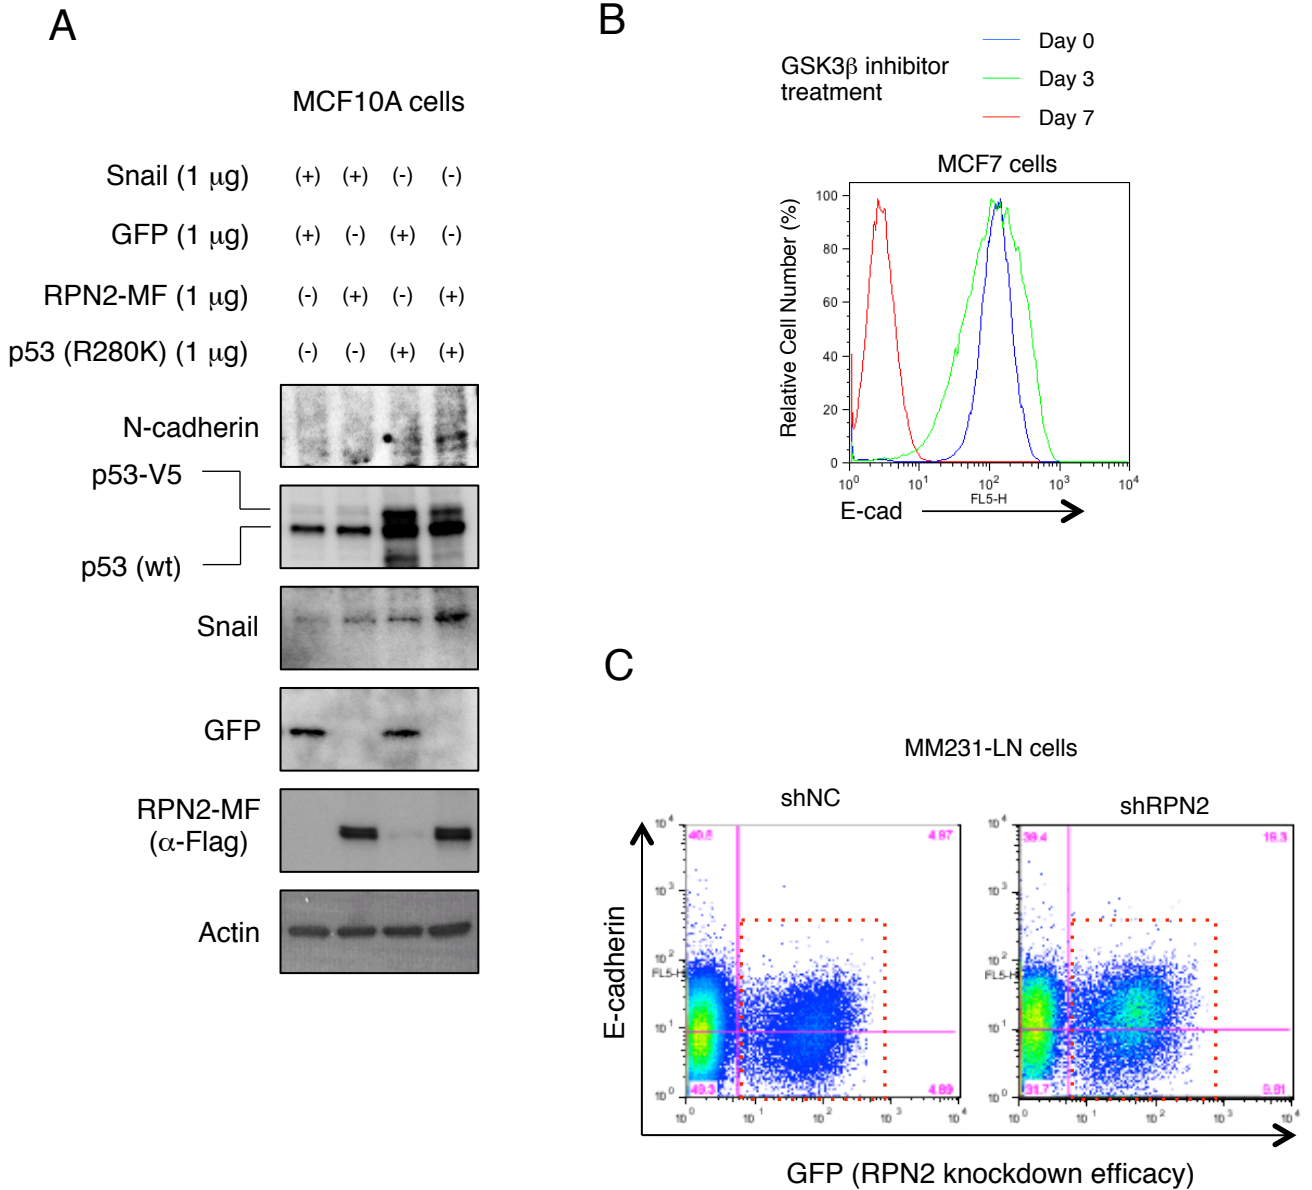

**Figure S3**

(A) Western blot analysis. Cell lysates were subjected to western blot analysis with anti-p53, anti-Flag, anti-Snail, anti-N-cadherin, anti-GFP and anti-actin antibodies. (B) GSK3 $\beta$  inhibitor (CHIR99021, 3  $\mu$ M) suppressed E-cadherin expression. (C) RPN2 knockdown reduced E-cadherin negative fraction.



A

NOD-Scid mice, Female, 6 week-old  
Subcutaneous Injection of CSC

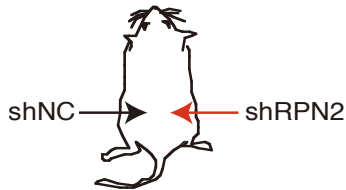

| Cell line | Cell number (cells/site) | shRPN2 | shNC |
|-----------|--------------------------|--------|------|
| MM231-LN  | 10 <sup>2</sup>          | 1/5    | 5/5  |

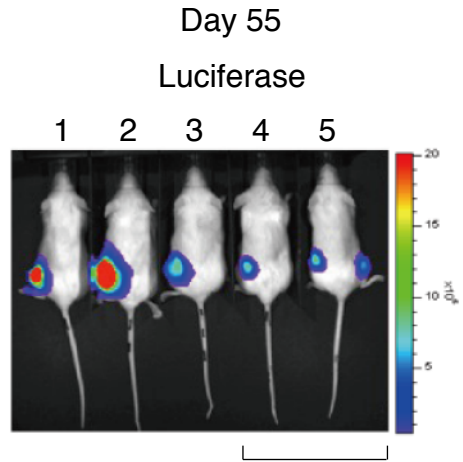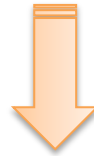

B

NOD-Scid mice, Female, 6 week-old  
Subcutaneous Injection of CSC

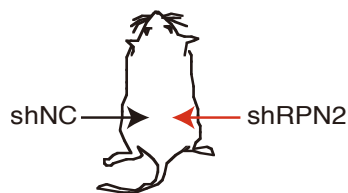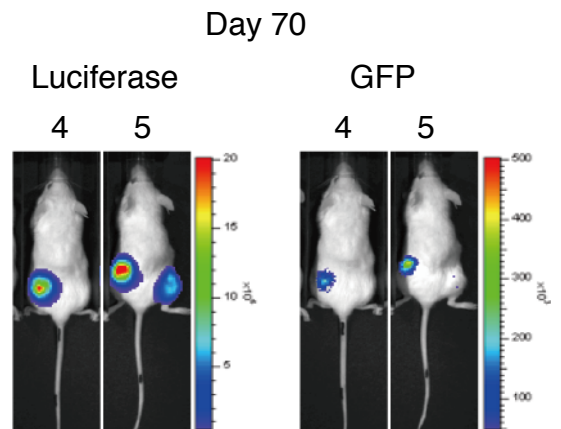

**Figure S4**

RPN2 regulates the tumorigenicity of CSCs.

(A) Tumor incidence of CSCs (CD44<sup>high</sup>/CD24<sup>low</sup>/GFP<sup>high</sup>) in MM231-LN shNC (Left) and MM231-LN shRPN2 (Right) cells after subcutaneous injection.

(B) Monitoring the knockdown efficacy of RPN2 by GFP expression.

A

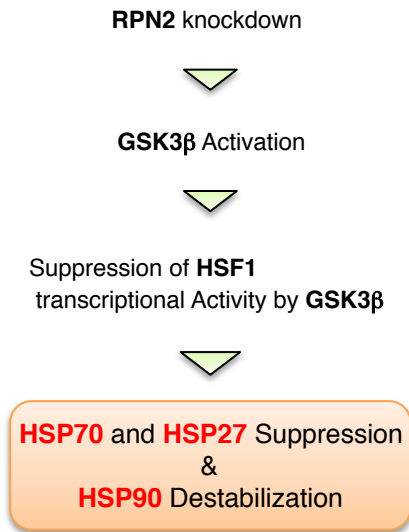

B

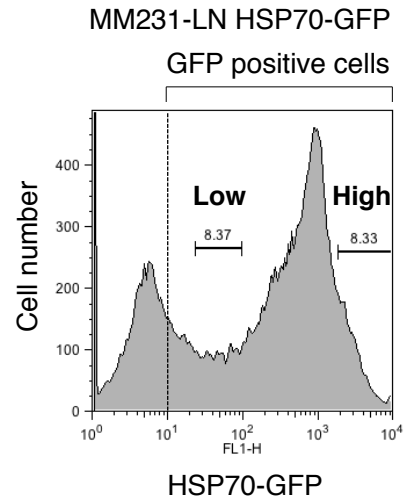

C

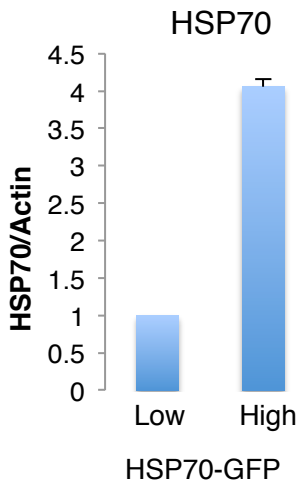

D

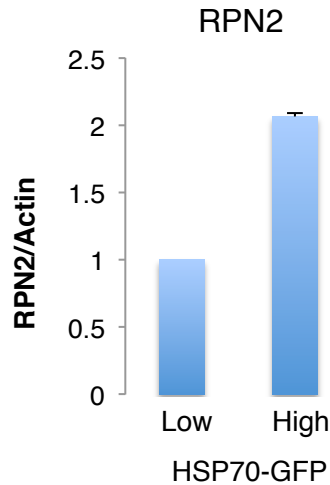

E

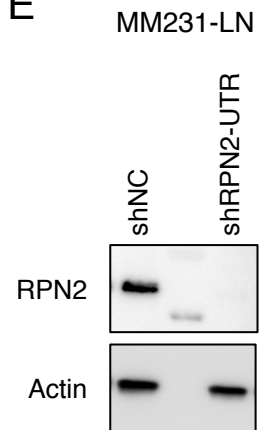

### Figure S5

GSK3 $\beta$ -mediated downregulation of heat shock proteins in RPN2 knockdown cells.

(A) Working model for GSK3 $\beta$ -mediated downregulation of heat shock proteins in RPN2 knockdown cells. (B) Establishment of MM231-LN cells expressing HSP70 promoter driven GFP (MM231-LN HSP70-GFP). (C) and (D) MM231-LN HSP70-GFP cells were segregated by cell sorting into GFP high and GFP low subsets as in (B); sorted subsets were then compared for HSP70 and RPN2 expression by quantitative real-time PCR. (E) Establishment of MM231-LN shRPN2-UTR. Western blot analysis was performed with anti-RPN2 and anti-Actin antibodies.

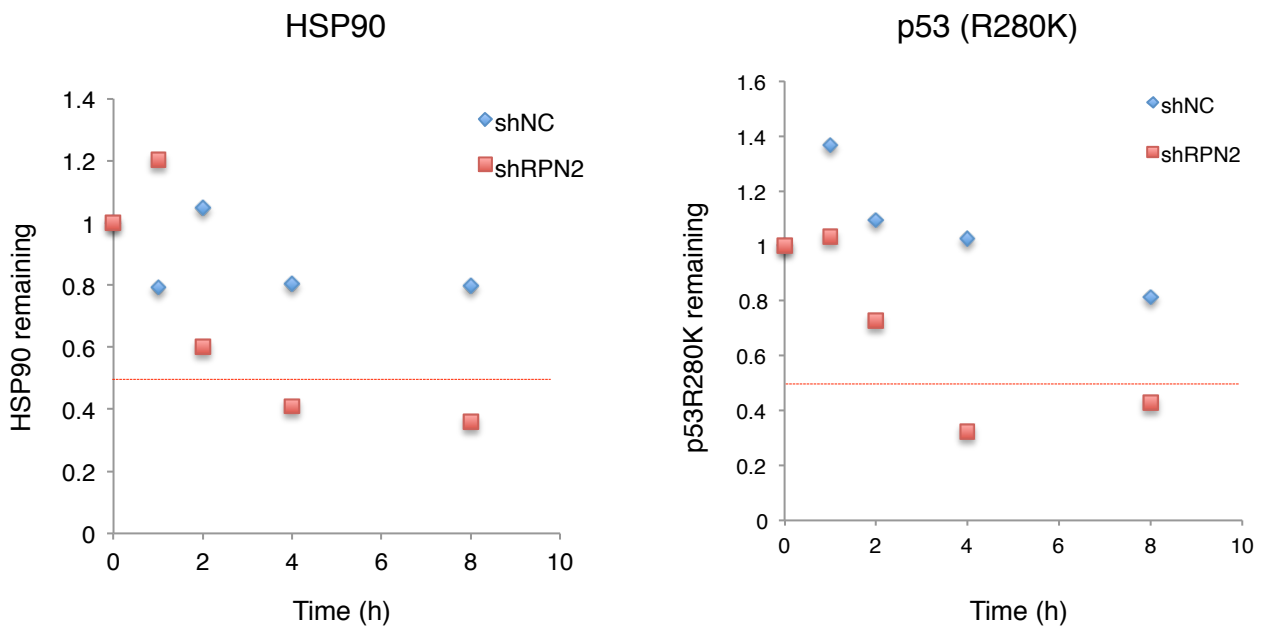**Figure S6**

RPN2 knockdown reduced half-life of HSP90 and p53R280K.

(A) MM231-LN shNC and MM231-LN shRPN2 cells were treated with cycloheximide (50  $\mu\text{g/ml}$ ) for 0–8 h. Cell lysates were subjected to western blotting with anti-HSP90, anti-p53 and anti-actin antibodies (fig. 5a and 6e). Half-life of HSP90 and p53R280K were calculated from the western blots (signal intensity was normalized to beta-actin).

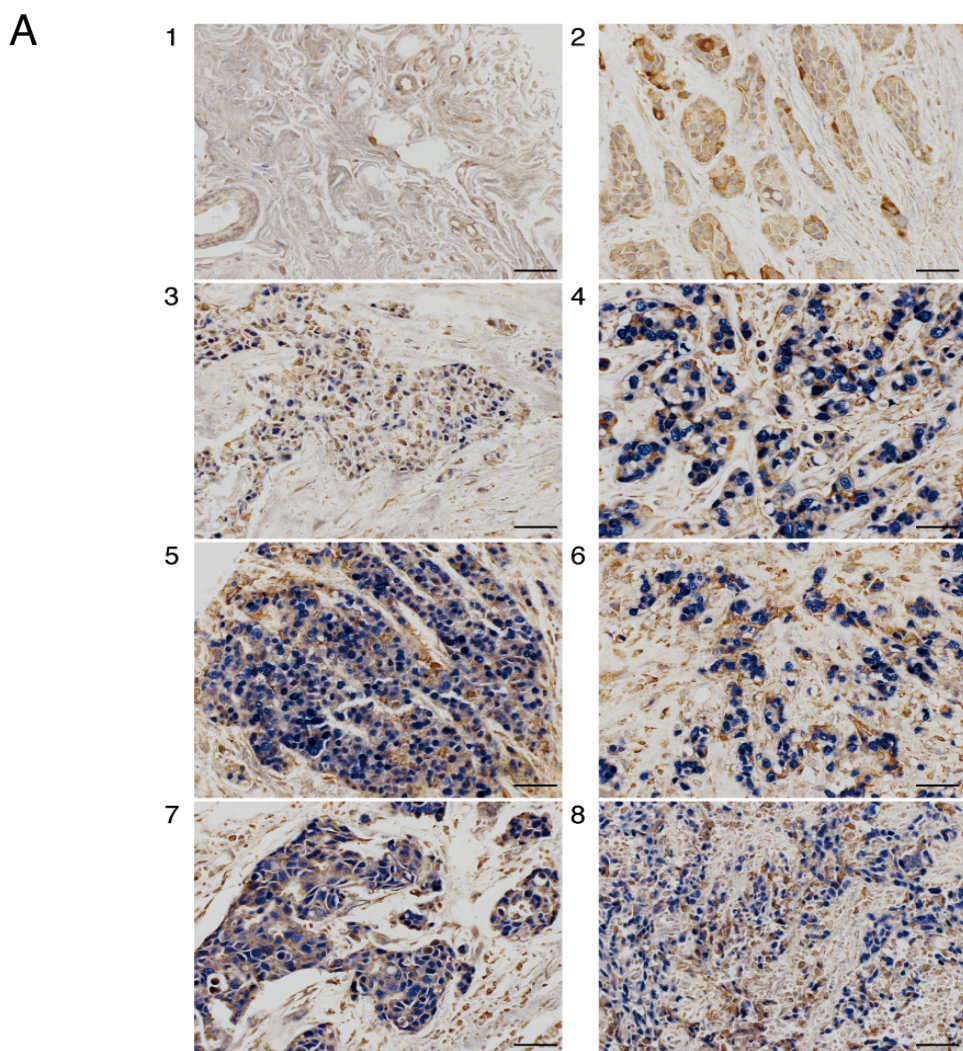

**B**

| Sample Number | Age | Sex | Diagnosis                          | T stage | LN    | ER  | PR  |
|---------------|-----|-----|------------------------------------|---------|-------|-----|-----|
| 1             | 37  | F   | Normal                             | -       | -     | -   | -   |
| 2             | 39  | F   | Infiltrating ductal carcinoma      | T3      | 0/37  | (-) | (-) |
| 3             | 65  | F   | Infiltrating ductal carcinoma      | T2      | 0/9   | (+) | (-) |
| 4             | 33  | F   | Infiltrating ductal carcinoma      | T3      | 25/25 | (+) | (+) |
| 5             | 43  | F   | Infiltrating ductal carcinoma      | T3      | 25/25 | (-) | (-) |
| 6             | 35  | F   | Infiltrating ductal carcinoma      | T3      | 8/14  | (+) | (-) |
| 7             | 47  | F   | Infiltrating ductal carcinoma      | T2      | 8/17  | (-) | (-) |
| 8             | 45  | F   | metastatic carcinoma in lymph node | T1c     | 22/26 | (-) | (-) |

**Figure S7**

The expression of RPN2 and mutant p53 in breast cancer tissues. (A) Immunohistochemical staining of RPN2 (Brown) and mutant p53 (Blue) in breast cancer tissues classified by the extent of lymph node metastasis (LN) as shown in (B). ER, Estrogen Receptor; PR, Progesterone Receptor. Scale bar, 50  $\mu$ m.

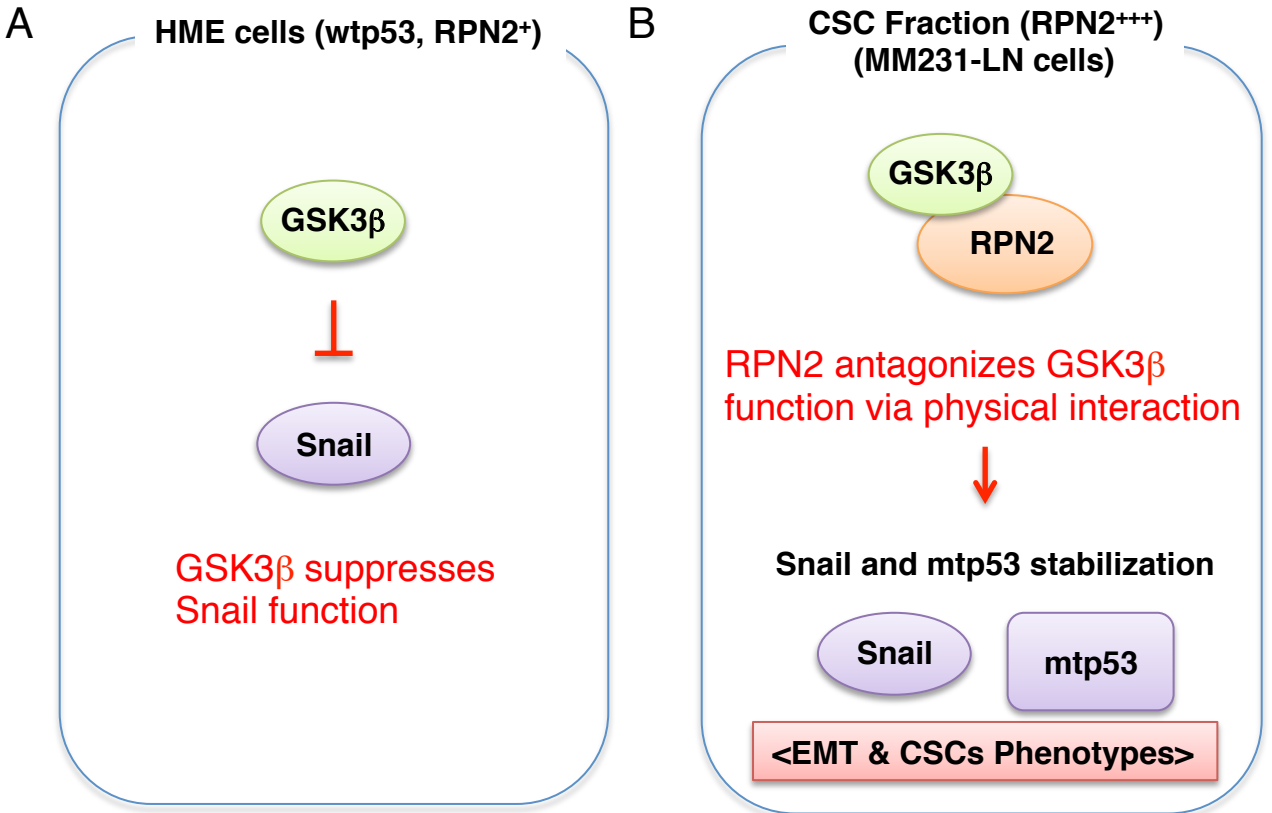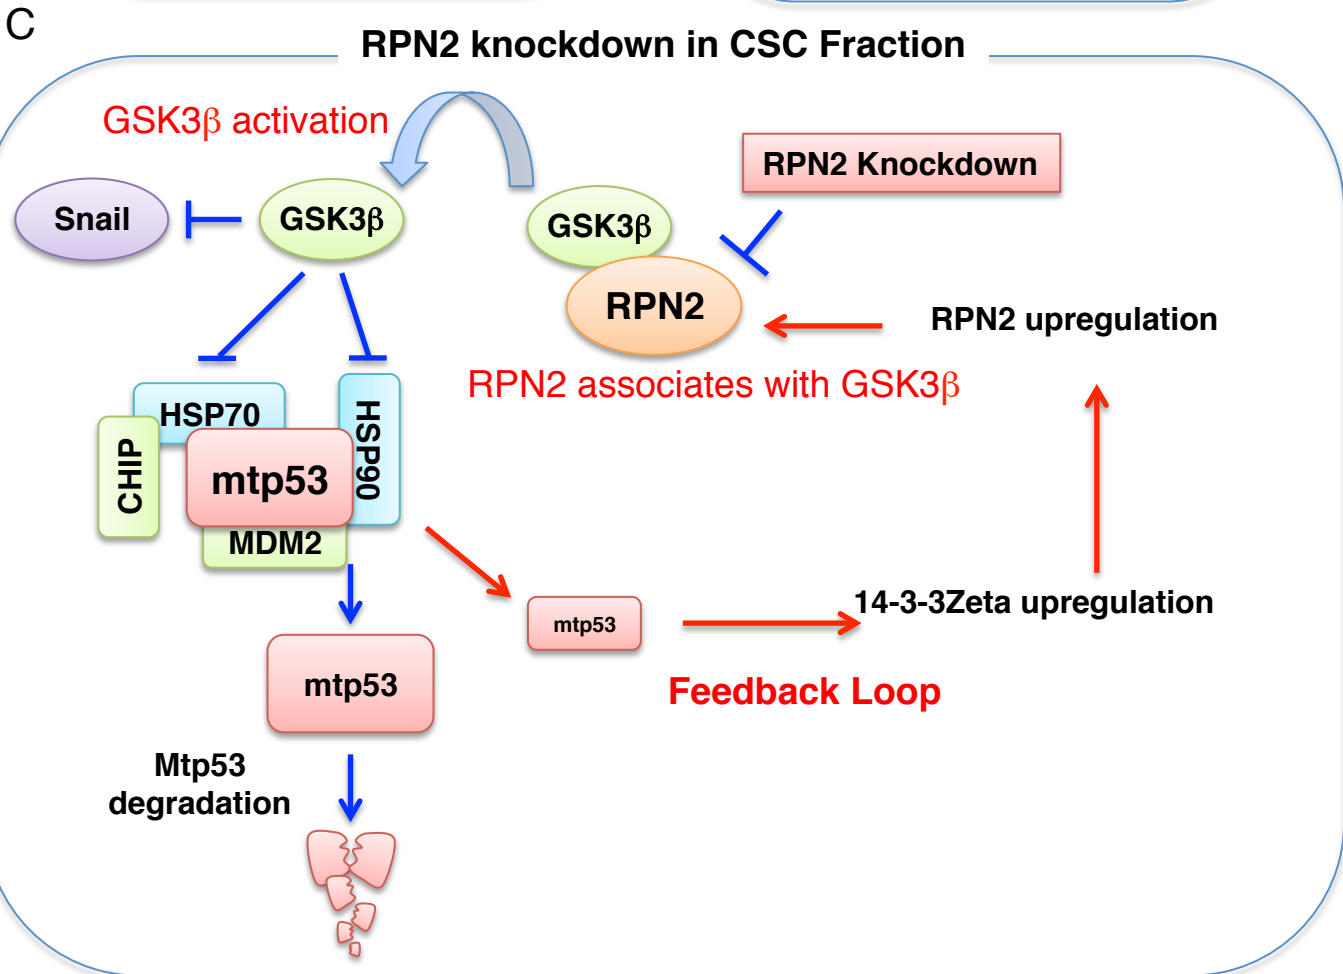

Figure S8 Working model for RPN2 mediated mtp53 stabilization.

A

Supplementary Fig. S2B

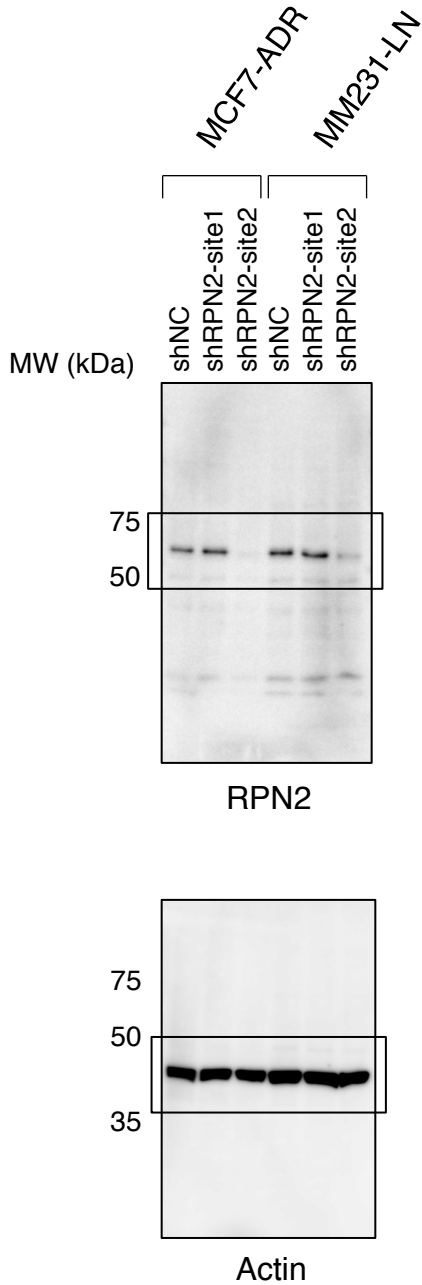

B

Fig. 6b

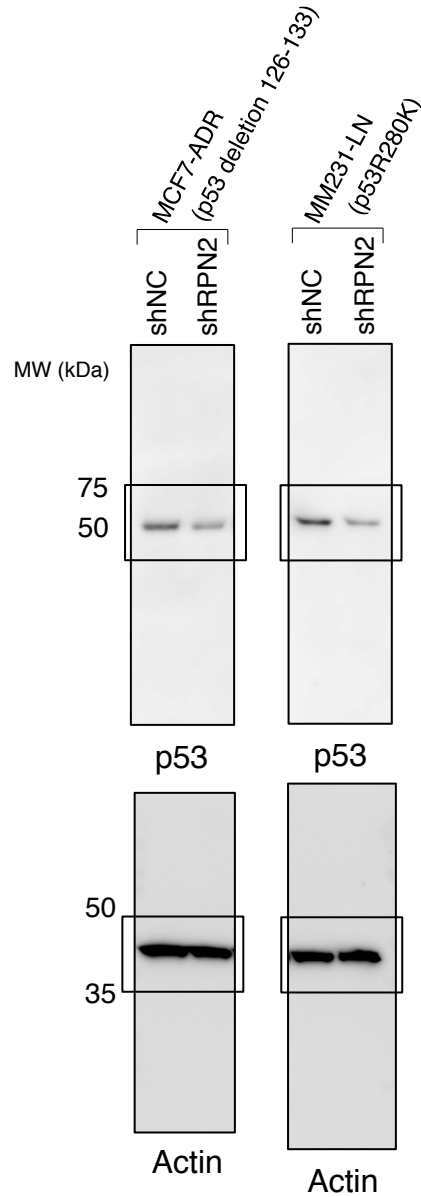

**Figure S9** Full scans of western blots shown in the main and supplementary figures. (A) The full blots shown in Fig. S2B with the locations of MW (molecular weight). (B) The full blots shown in Fig. 6b.

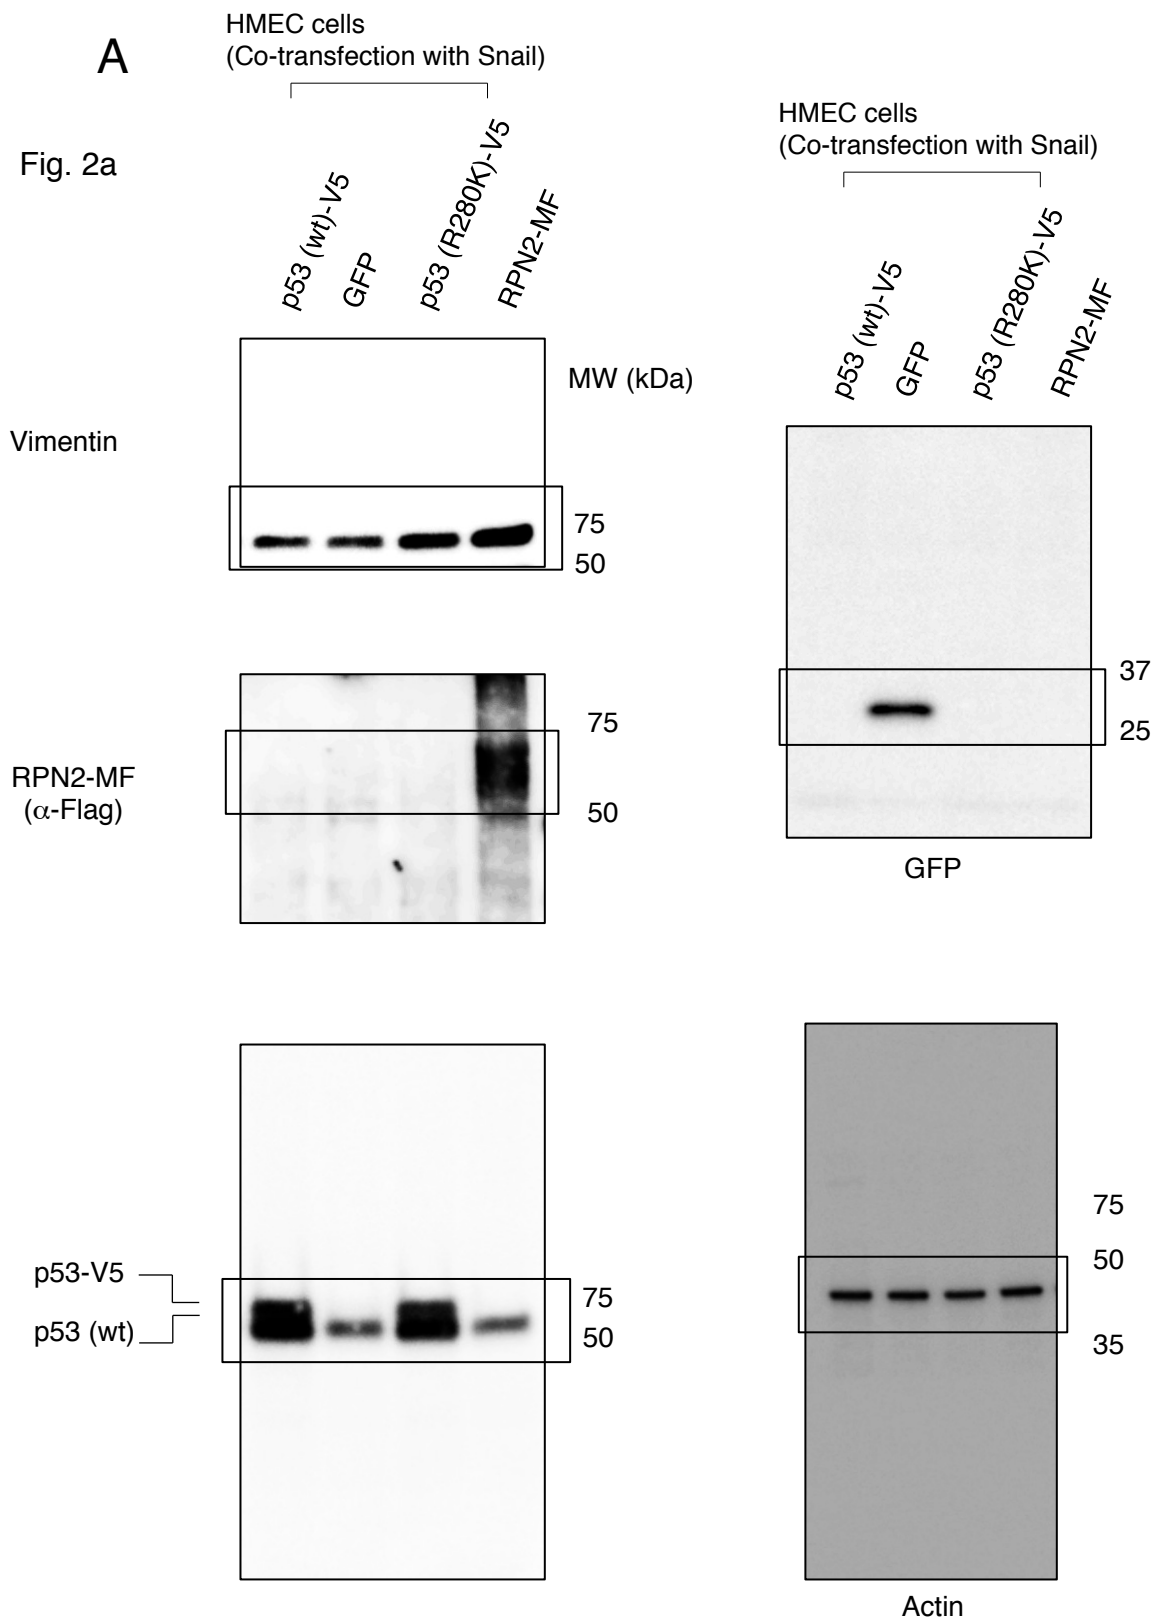

**Figure S10** Full scans of western blots shown in the main and supplementary figures.  
(A) The full blots shown in Fig. 2a.

A

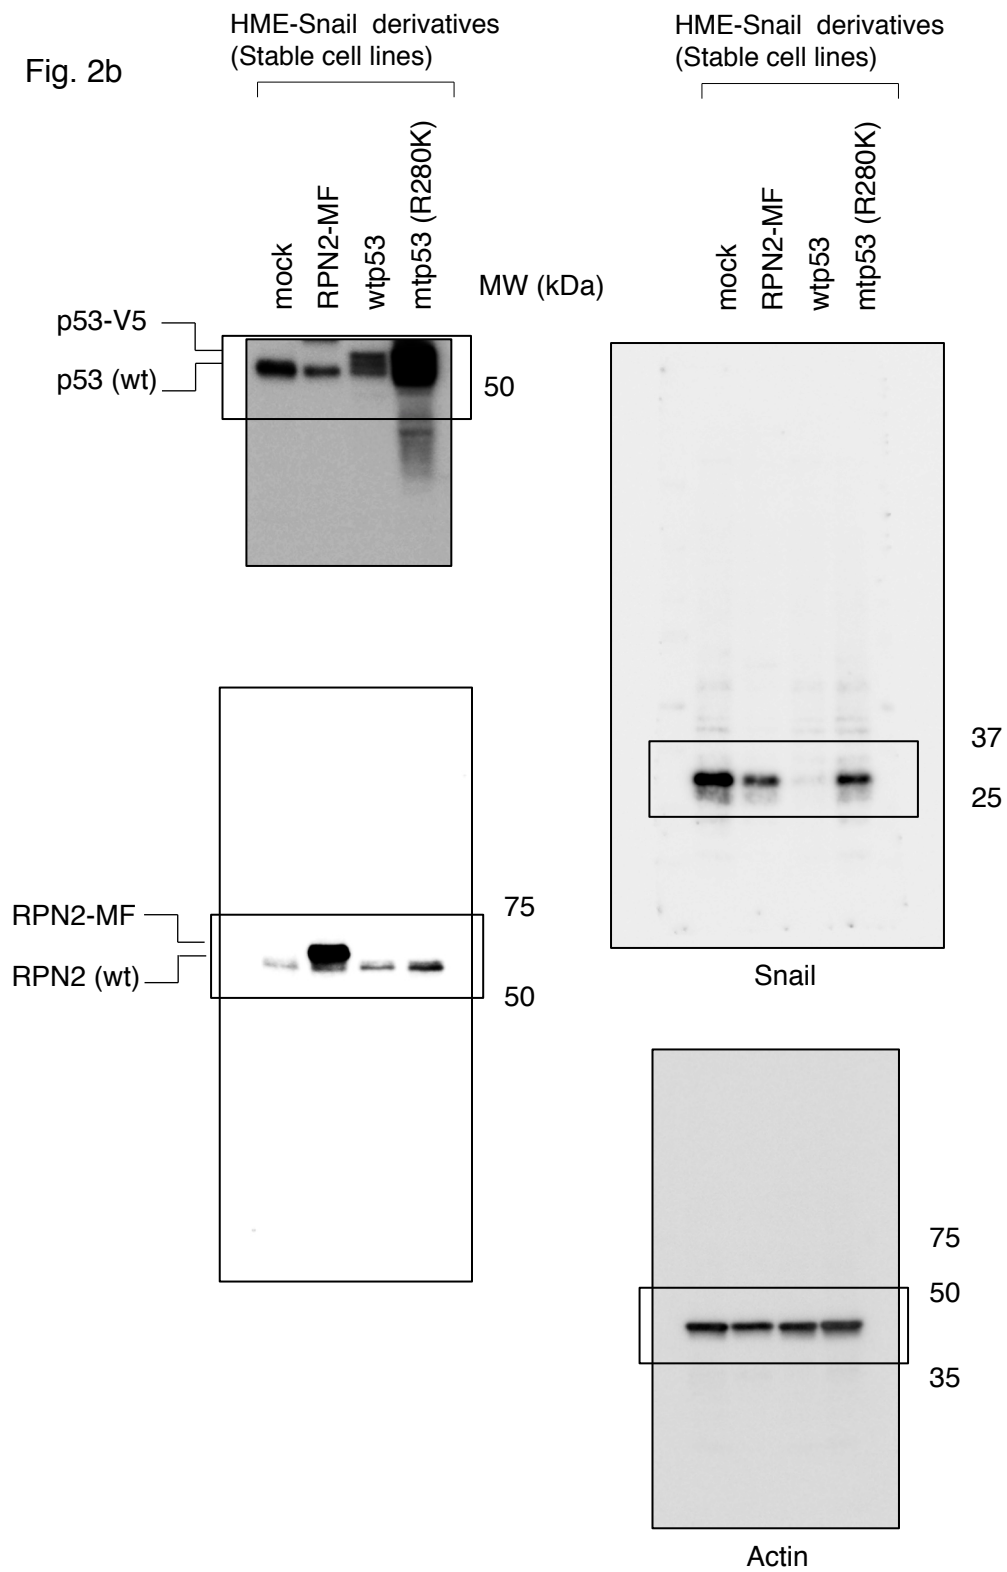

**Figure S11** Full scans of western blots shown in the main and supplementary figures. (A) The full blots shown in Fig. 2b.



A

Fig. 2c

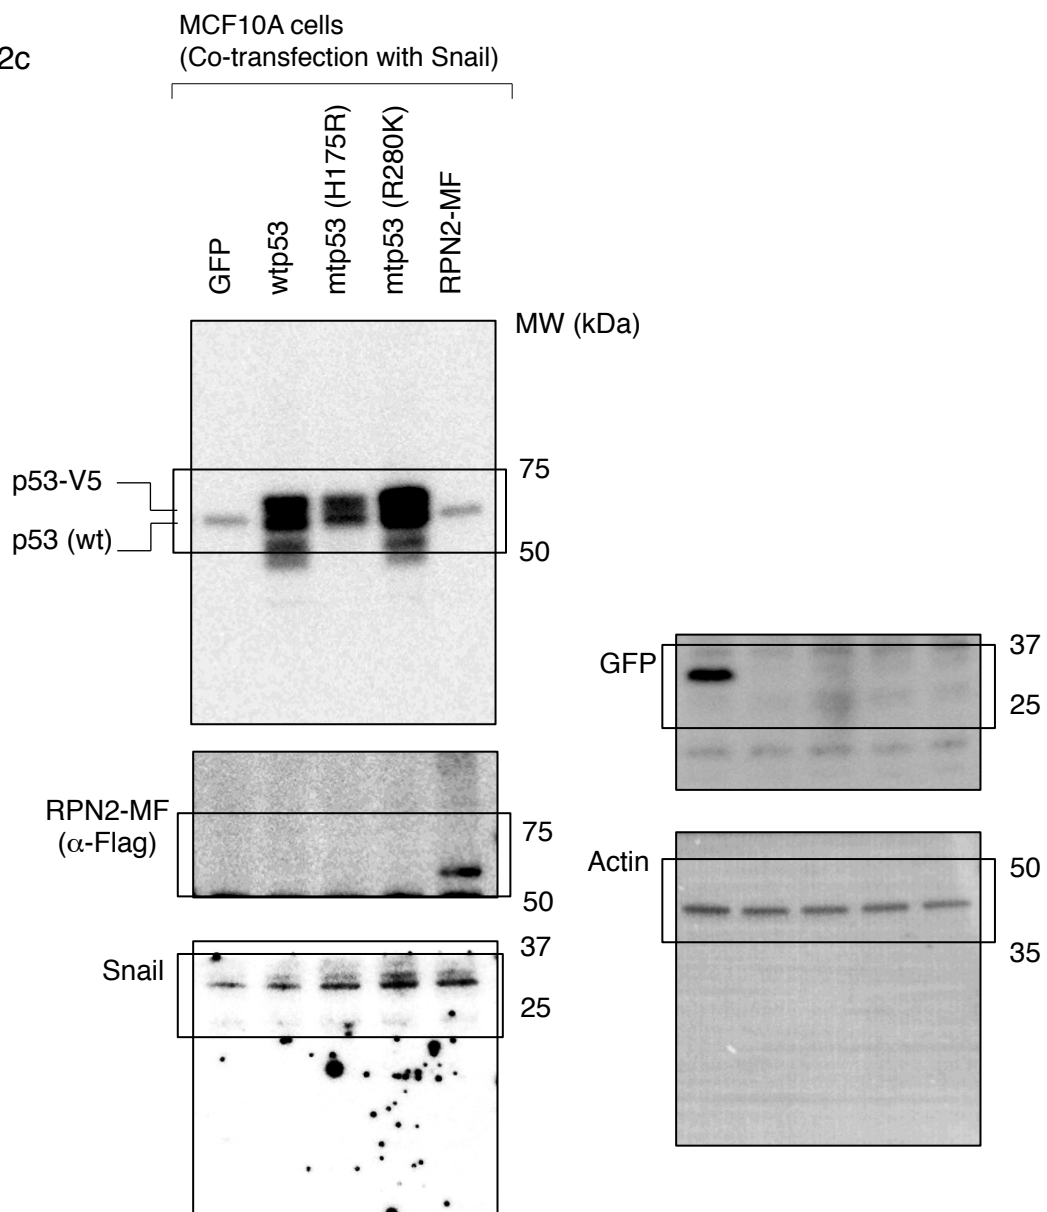

**Figure S12** Full scans of western blots shown in the main and supplementary figures.  
(A) The full blots shown in Fig. 2c.

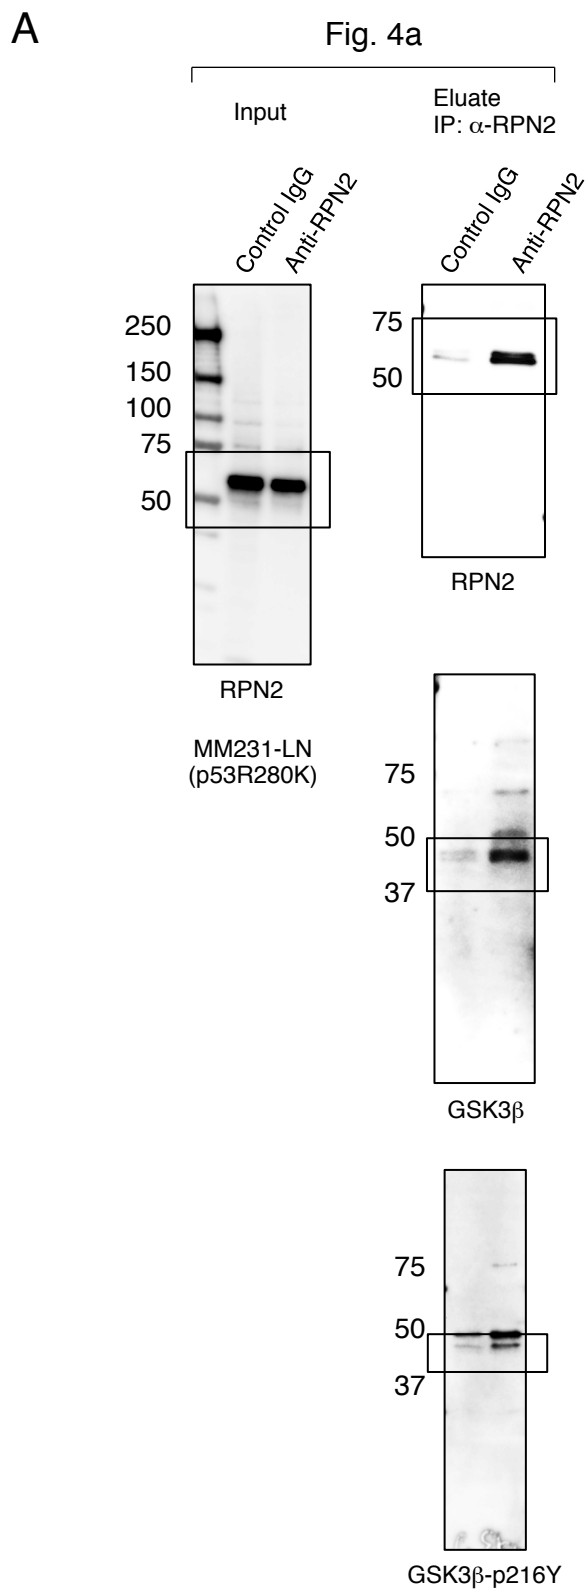

**Figure S13** Full scans of western blots shown in the main and supplementary figures. (A) The full blots shown in Fig. 4a.

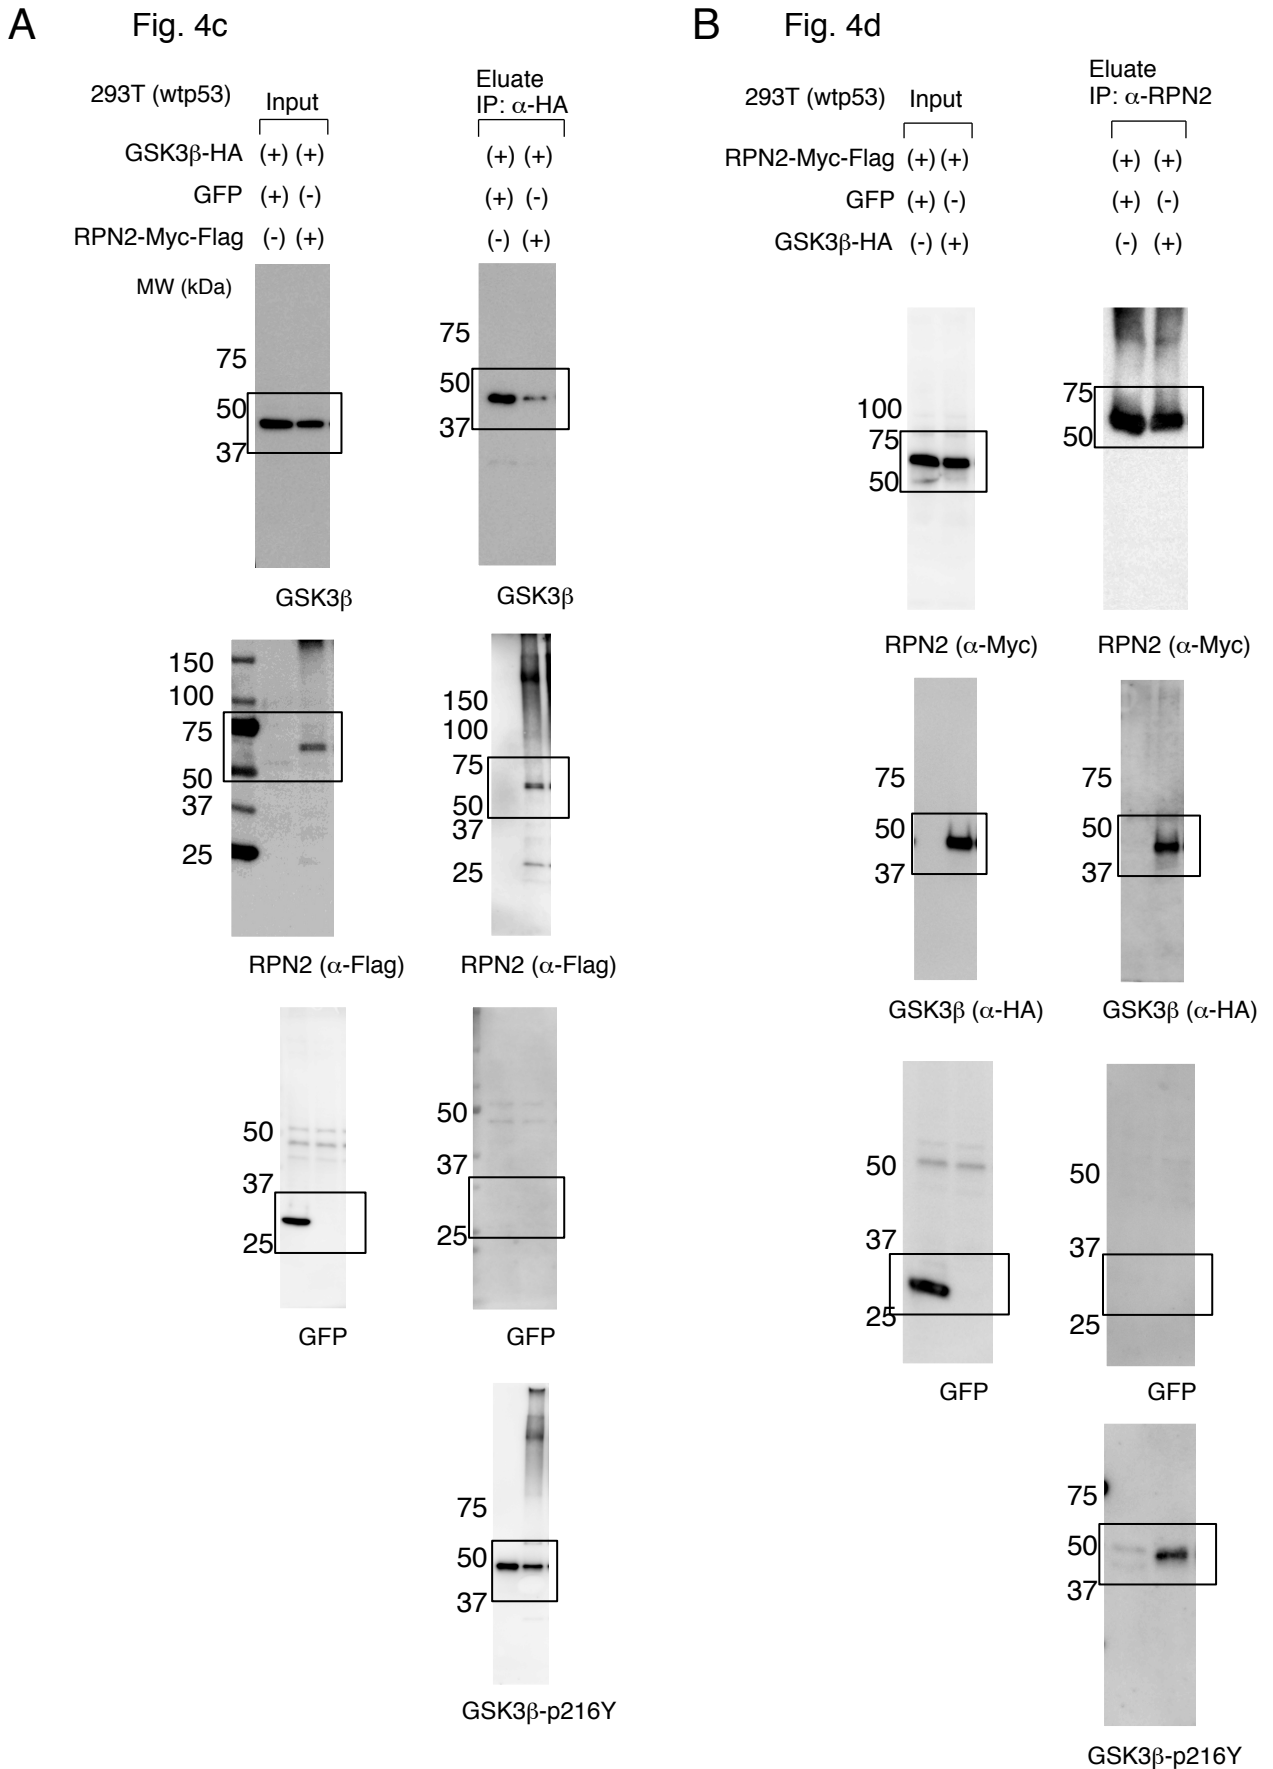

**Figure S14** Full scans of western blots shown in the main figures. (A) The full blots shown in Fig. 4c with the locations of MW. (B) The full blots shown in Fig. 4d.

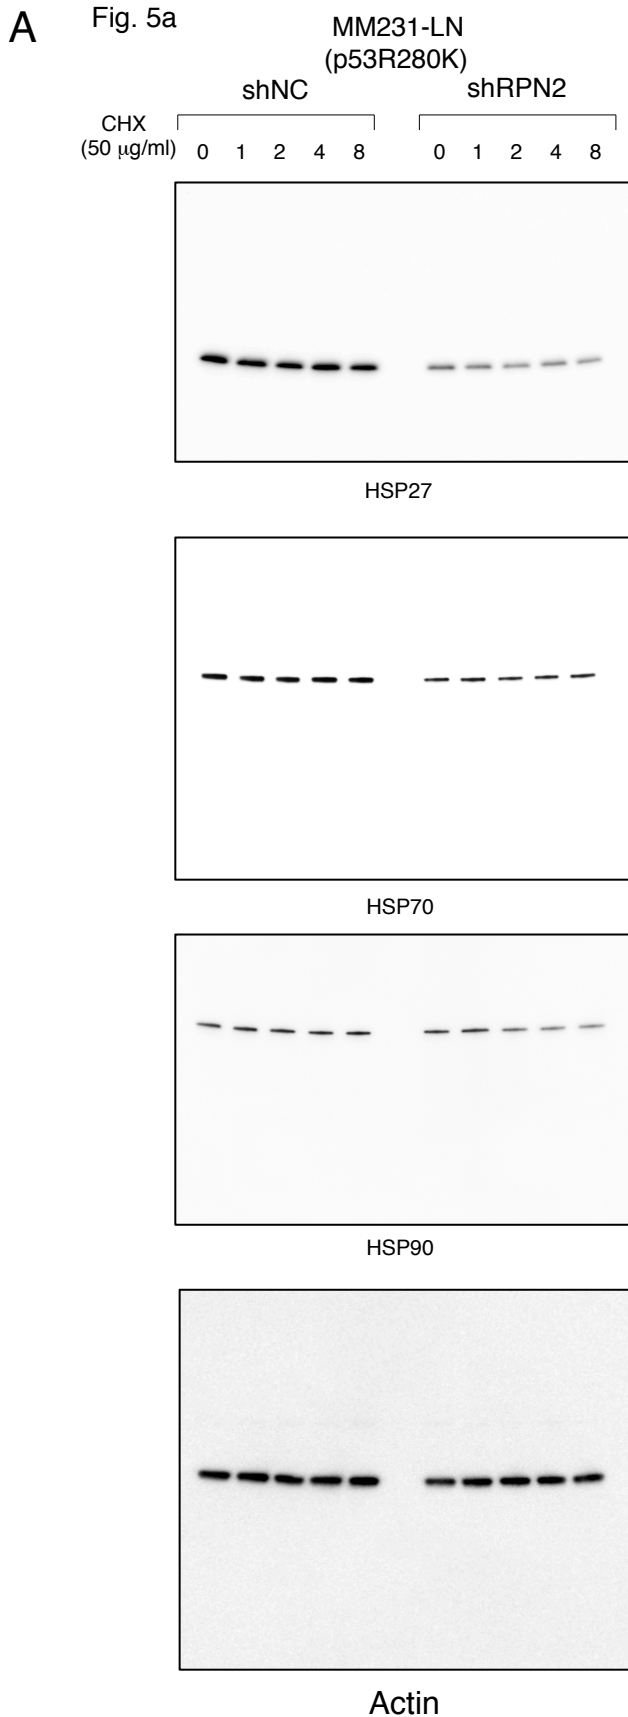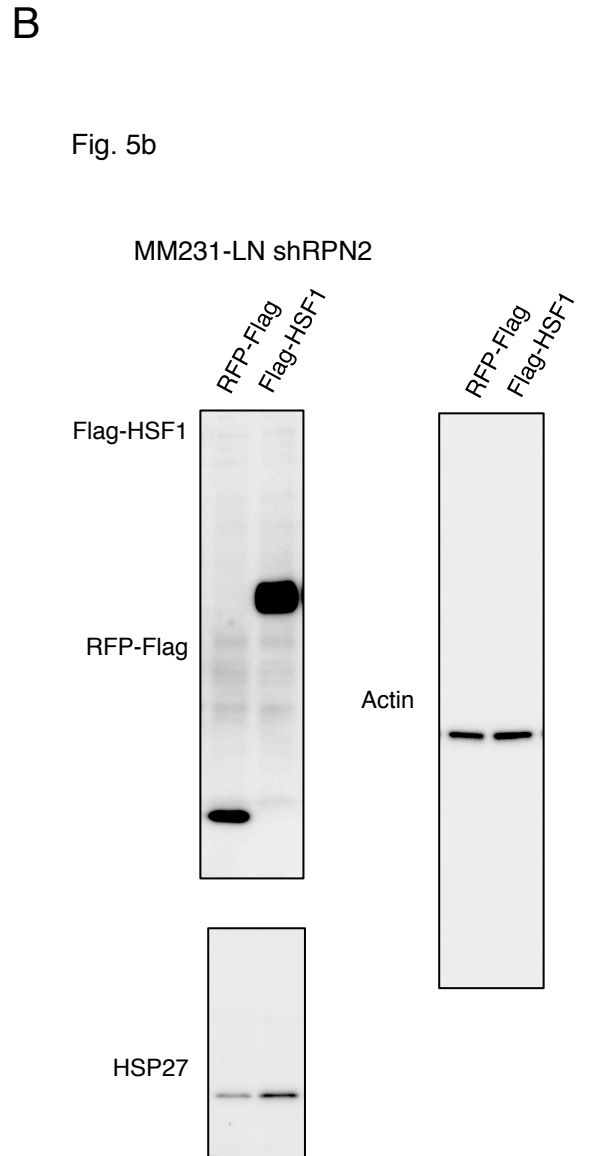

**Figure S15** Full scans of western blots shown in the main figures. (A) The full blots shown in Fig. 5a. (B) The full blots shown in Fig. 5b

A

Fig. 6e

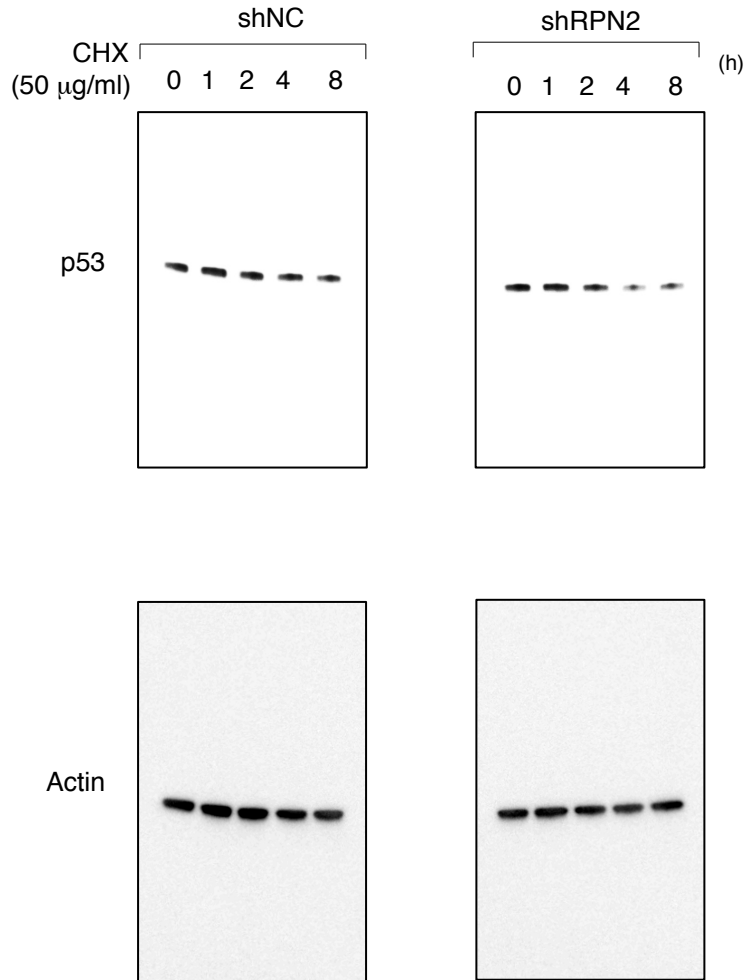

**Figure S16** Full scans of western blots shown in the main figures. (A) The full blots shown in Fig. 6e.

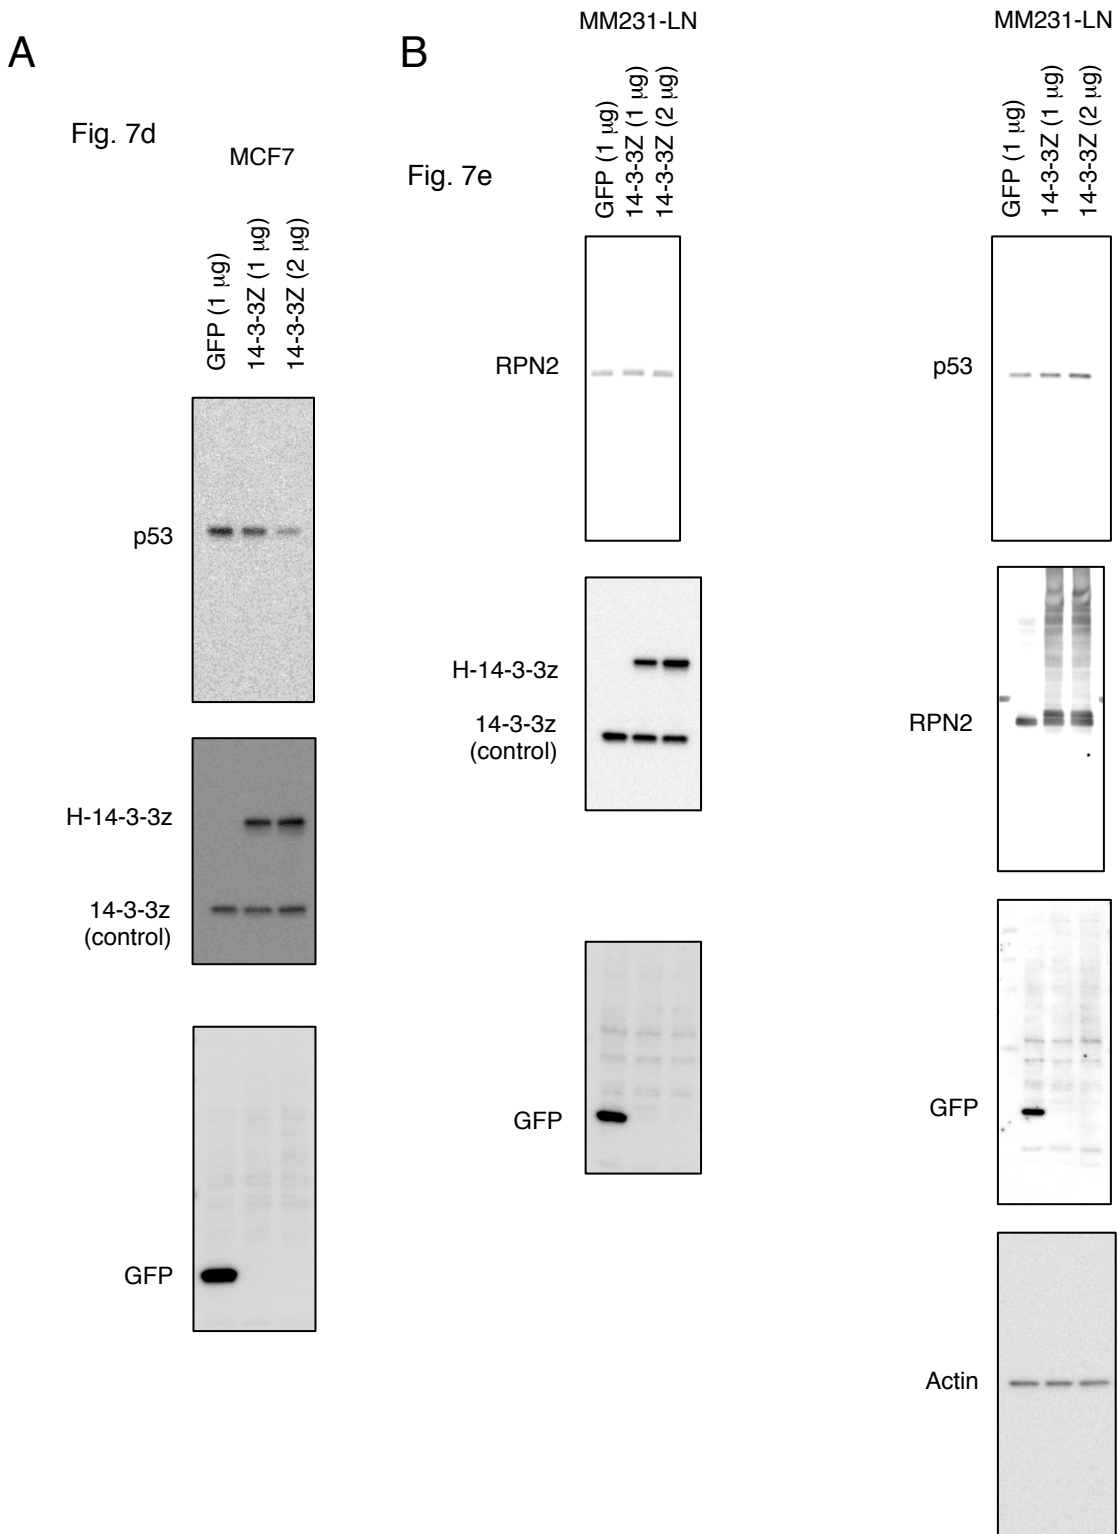

**Figure S17** Full scans of western blots shown in the main figures. (A) The full blots shown in Fig. 7d. (B) The full blots shown in Fig. 7e.

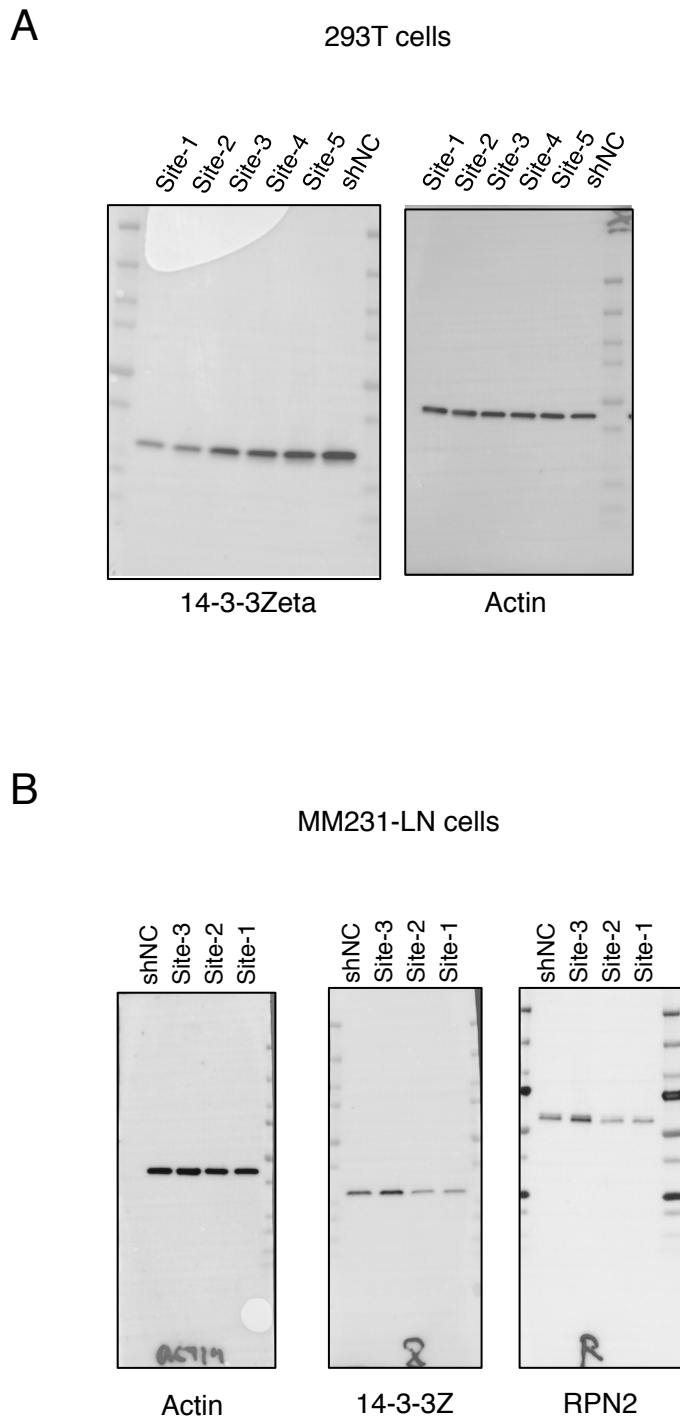

**Figure S18** Full scans of western blots shown in the main figures. (A) Knockdown efficacy of lentivirus vectors expressing shRNA against 14-3-3zeta. (B) The full blots shown in Fig. 7h.

## Upregulated

| ID                 | RATIO (shRPN2/shNC) | ISCORE | EXPECT   | SEQUENCE    |
|--------------------|---------------------|--------|----------|-------------|
| <b>1433Z_HUMAN</b> | 9.58                | 33.6   | 0.058    | DSTLIMQLLR  |
| ACTN1_HUMAN        | 2.95                | 36.42  | 0.034    | LASDLLEWIR  |
| ACTN4_HUMAN        | 2.95                | 36.42  | 0.034    | LASDLLEWIR  |
| RS10_HUMAN         | 30.61               | 47.47  | 0.002    | IAIYELLFK   |
| HNRPK_HUMAN        | 3.68                | 55.95  | 3.10E-04 | IILDISESPIK |
| CLH1_HUMAN         | 14.49               | 33.72  | 0.048    | LLLPWLEAR   |

## Downregulated

| ID               | RATIO (shRPN2/shNC) | ISCORE | EXPECT   | SEQUENCE        |
|------------------|---------------------|--------|----------|-----------------|
| ISCA2_HUMAN      | 0.5                 | 30.44  | 0.13     | AVTPWPR         |
| HBB_HUMAN        | 0.37                | 36.73  | 0.027    | LLVVYPWTQR      |
| BGAT_HUMAN       | 0.52                | 31.34  | 0.057    | VSLPR           |
| MYOZ2_HUMAN      | 0.52                | 31.34  | 0.057    | VSIPR           |
| YP023_HUMAN      | 0.52                | 31.34  | 0.057    | VSPPR           |
| CQ047_HUMAN      | 0.52                | 31.34  | 0.057    | VSPPR           |
| VTNC_HUMAN       | 0.28                | 51.98  | 7.30E-04 | DVWGIEGPIDAAFTR |
| ALBU_HUMAN       | 0.27                | 34.99  | 0.034    | YLYEIAR         |
| QSOX1_HUMAN      | 0.35                | 32.28  | 0.079    | LAGAPSEDPQFPK   |
| <b>P53_HUMAN</b> | 0.35                | 5.82   | 35       | ALPNTSSSPQPK    |

**Table S1.** Detected peptides that differed between RPN2 knockdown cell line (MM231-LN shRPN2) and control (MM231-LN shNC). Protein identification of peptide peaks with significant difference between MM231-LNshNC and MM231-LN shRPN2.



**Table S2.** The sequences of primers for real-time RT-PCR analysis

| Gene  | Forward Primer         | Reverse Primer         |
|-------|------------------------|------------------------|
| ACTB  | ATTGCCGACAGGATGCAGA    | GAGTACTTGCGCTCAGGAGGA  |
| RPN2  | CTTCCAGAGCCACTGTCCTC   | CCGGTTGTCACCTTCAACTT   |
| p53   | TAACAGTTCCTGCATGGGCGGC | AGGACAGGCACAAACACGCACC |
| SNAIL | ACCCACATCCTTCTCACTG    | TACAAAAACCCACGCAGACA   |
